# Supplementary material for: Enhanced photocatalytic CO2 conversion over LaPO4 by introduction of CoCl2 as a hole mediator
Source: Royal Society of Chemistry journal article supplement (doi:10.1039/c6ra02958b), 2016-01-01
Supplement: c6ra02958b1.pdf [file c6ra02958b1.pdf]

## **Electronic Supplementary Information**

### **Enhanced Photocatalytic CO<sub>2</sub> Conversion over LaPO<sub>4</sub> by Introduction of CoCl<sub>2</sub> as Hole Mediator**

**Bao Pan, Yangen Zhou, Wenyue Su\*, Xuxu Wang**

State Key Laboratory of Photocatalysis on Energy and Environment,

Fuzhou University, Fuzhou 350002, P. R. China

Corresponding author Tel & Fax: (+86)591-83779105.

E-mail: [suweny@fzu.edu.cn](mailto:suweny@fzu.edu.cn).

## Experimental Section

**Preparation of samples.**  $\text{LaPO}_4$  samples were synthesized by hydrothermal method. All reagents were of analytical purity and used without further purification. 3 mmol  $\text{La}(\text{NO}_3)_3 \cdot 6\text{H}_2\text{O}$  and 3 mmol  $(\text{NH}_4)_2\text{HPO}_4$  were dissolved in 35 mL of deionized water with stirring, respectively. Then  $(\text{NH}_4)_2\text{HPO}_4$  solution was added into the  $\text{La}(\text{NO}_3)_3$  solution dropwise under vigorous stirring. After stirring for 1 h, the mixture was transferred into a 100 mL Teflon liner. The autoclaves were heated at 180 °C for 24 h, and then cooled to ambient temperature naturally. The precipitates were washed with distilled water several times before it was dried at 60 °C to obtain the final product.  $\text{LaPO}_4$ -Pt samples were prepared via impregnating  $\text{LaPO}_4$  powder in  $\text{H}_2\text{PtCl}_6$  aqueous solution followed by  $\text{NaBH}_4$  reduction.

**Sample characterization.** The Powder X-ray diffraction (XRD) was analyzed on a Bruker D8 Advance X-ray diffractometer. Fourier transformed infrared (FTIR) spectra were recorded using a Nicolet Magna 670 FTIR spectrometer in KBr at a concentration of ca. 1 %wt. Photoluminescence (PL) spectra were performed on an Edinburgh

FL/FS900 spectrophotometer at room temperature. Absorption spectra of solution were analyzed using a Varian Cary 50 Scan ultraviolet–visible spectrophotometer. A HP 5973-Agilent 6890 gas chromatography mass spectrometry (GC-MS) was employed to analyze the products of the  $^{13}\text{CO}_2$  isotopic experiment. Photocurrent and cyclic voltammetry (CV) measurements were performed on a CHI Electrochemical System, using Pt plate and Ag/AgCl electrode as the counter electrode and reference electrode, respectively. The working electrode was made by dip-coating catalyst slurry ( $5\text{ mg}\cdot\text{mL}^{-1}$  in EtOH) on fluorine-doped tin oxide (FTO) glasses, the area of which was controlled as  $0.25\text{ cm}^2$ , and followed by air-drying.  $0.2\text{ M}$  of  $\text{Na}_2\text{SO}_4$  solution was used as electrolyte.

**Photoreduction of  $\text{CO}_2$ .** The photocatalytic reduction of  $\text{CO}_2$  was evaluated at  $1\text{ atm}$   $\text{CO}_2$  partial pressure in a  $200\text{ ml}$  reactor with an inner irradiation quartz reaction cell. The reactor was kept at  $20\text{ }^\circ\text{C}$  as controlled by cooling water. A  $125\text{ W}$  high-pressure Hg lamp (GGZ125, Shanghai Yaming Lighting Co, Ltd with a maximum emission at about  $365\text{ nm}$ ) was used as light source. Typically  $50\text{ mg}$  photocatalyst was suspended in  $70\text{ mL H}_2\text{O}$ . Before irradiation, the whole reaction system was first evacuated by a mechanical pump to ensure the air was eliminated. Secondly,  $\text{CO}_2$  (99.999% purity) was filled into the reactor for  $1\text{ h}$  with stirring to get a  $\text{CO}_2$ -saturated aqueous solution. The gas products were analyzed by GC (Agilent 6890N). The apparent quantum

yield (AQY) was also measured under the same photocatalytic reaction conditions. The incident light intensity of high pressure mercury lamp was measured by SpectriLight ILT950. The total number of incident photons was measured using a calibrated silicon photodiode. The AQY was calculated according to the following Eqs:

$$\text{AQY (\%)} = \frac{\text{number of reacted electrons}}{\text{number of incident photons}} \times 100$$

$$= \frac{\text{number of CH}_4 \text{ molecules} \times 8 + \text{number of H}_2 \text{ molecules} \times 2}{\text{number of incident photons}} \times 100$$

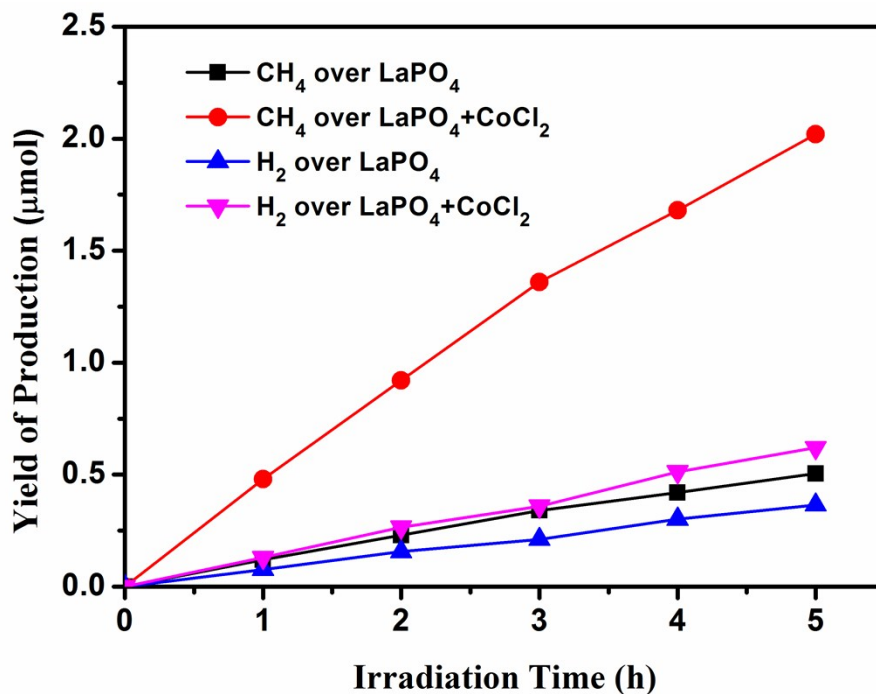

**Fig.S1** Production of CH<sub>4</sub> and H<sub>2</sub> formed as a function of irradiation time.

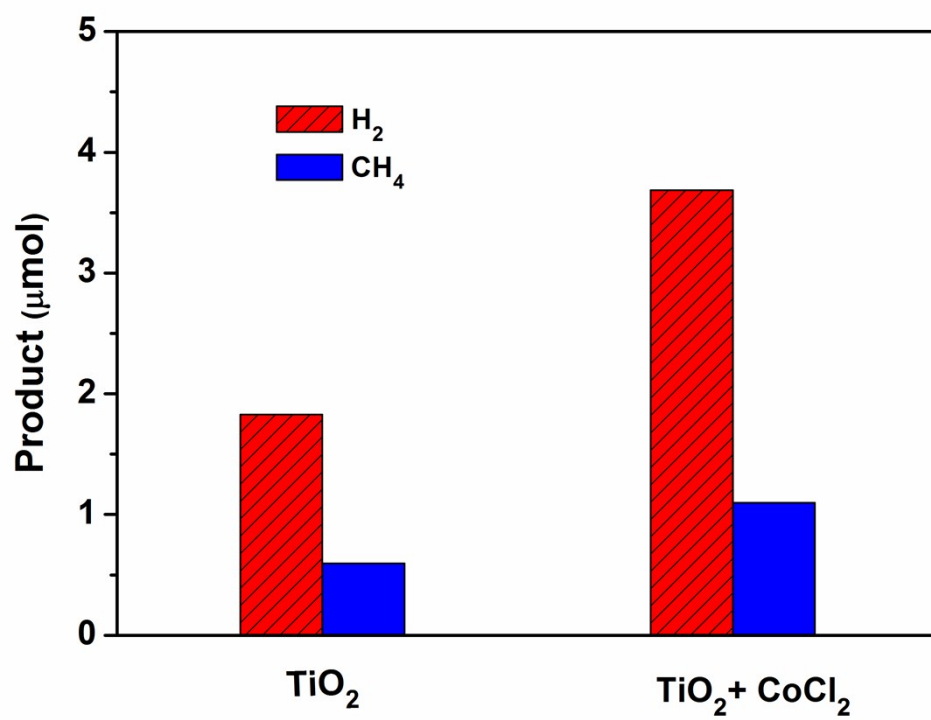

**Fig. S2** The production of CH<sub>4</sub> and H<sub>2</sub> generated over TiO<sub>2</sub> (P25) sample with and without introduction of CoCl<sub>2</sub> for 5h.

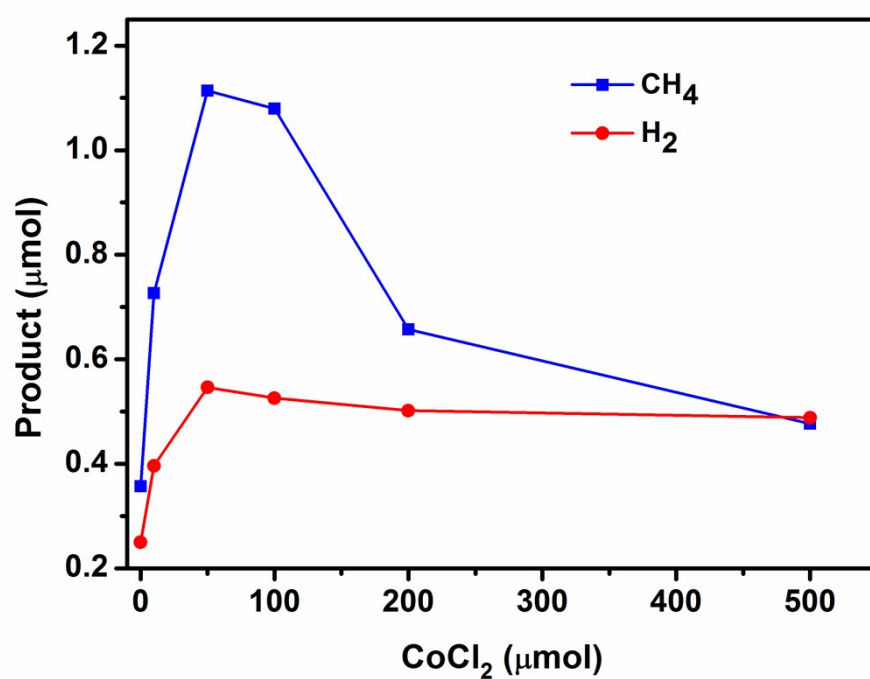

**Fig. S3** The effect of the  $\text{CoCl}_2$  amount on the  $\text{CH}_4$  and  $\text{H}_2$  evolution from the  $\text{CO}_2$  photoreduction system.

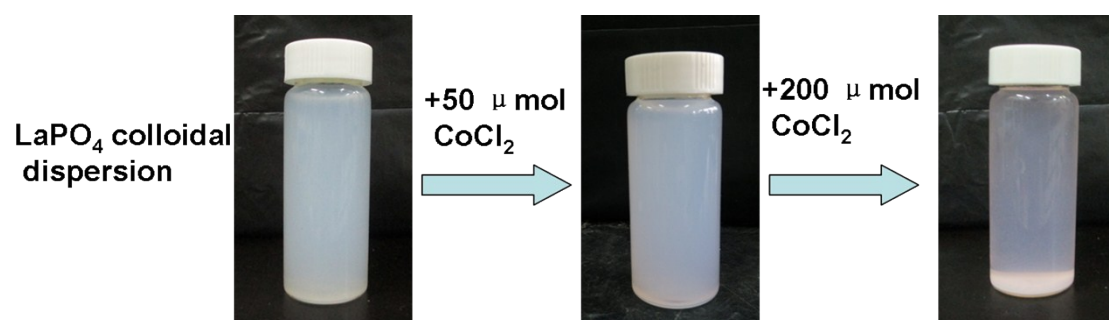

**Fig.S4** Photographs of the LaPO<sub>4</sub> colloidal dispersion with different amounts of CoCl<sub>2</sub> adding.

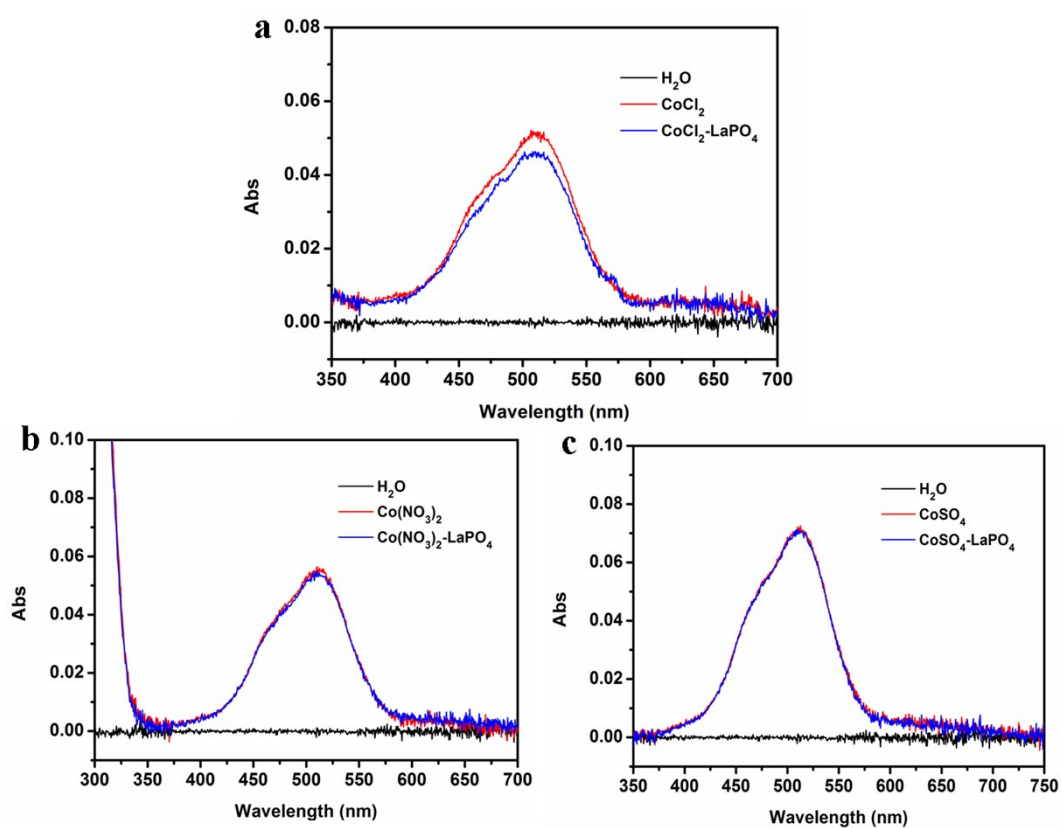

Fig. S5 The UV-vis absorption spectra of  $\text{CoCl}_2$  (a),  $\text{Co(NO}_3)_2$  (b) and  $\text{CoSO}_4$  (c) solution before and after the mixing with  $\text{LaPO}_4$  colloid in the dark.



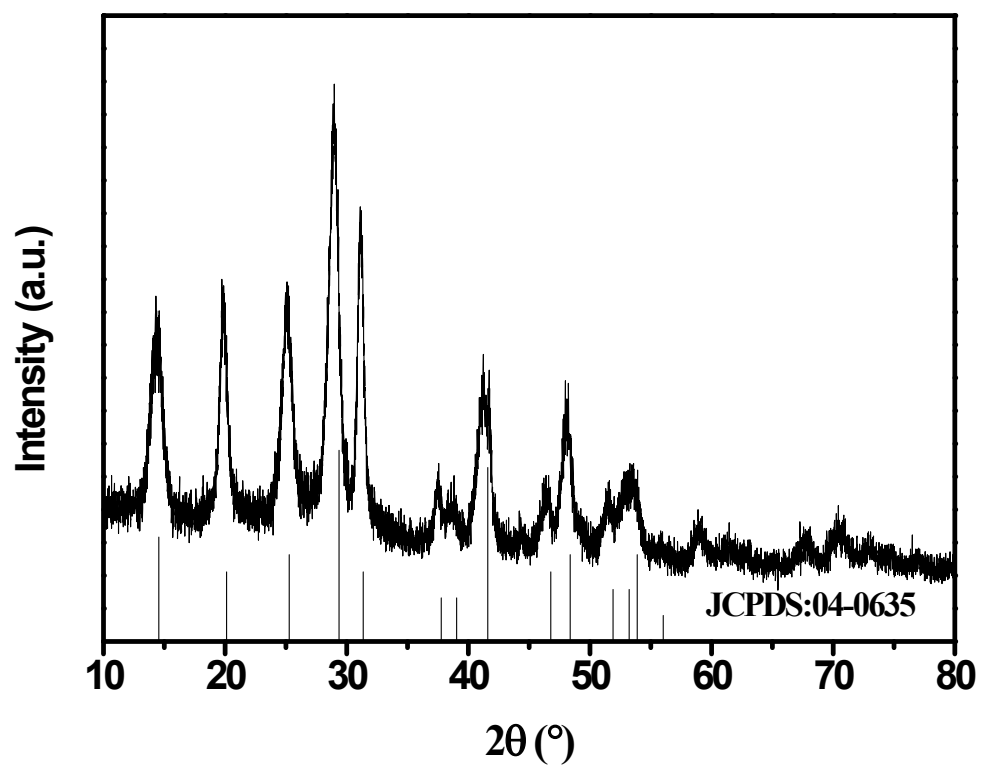

**Fig. S6** XRD of the prepared  $\text{LaPO}_4$  sample.

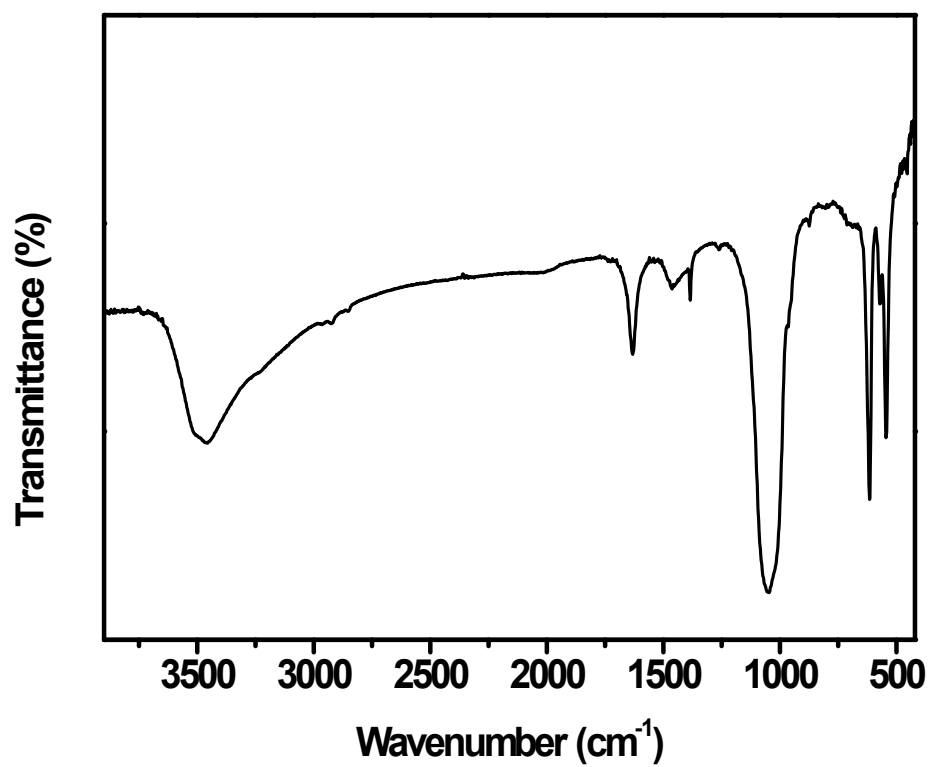

**Fig. S7** FT-IR of the prepared LaPO<sub>4</sub> sample.
